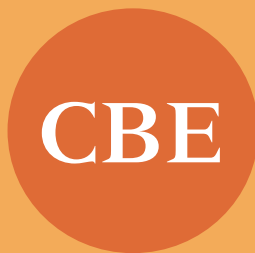

# Life Sciences Education

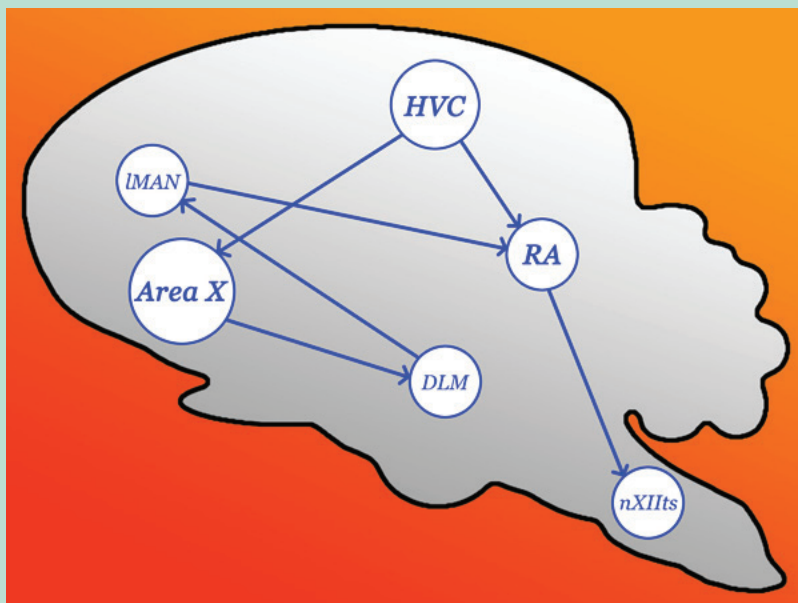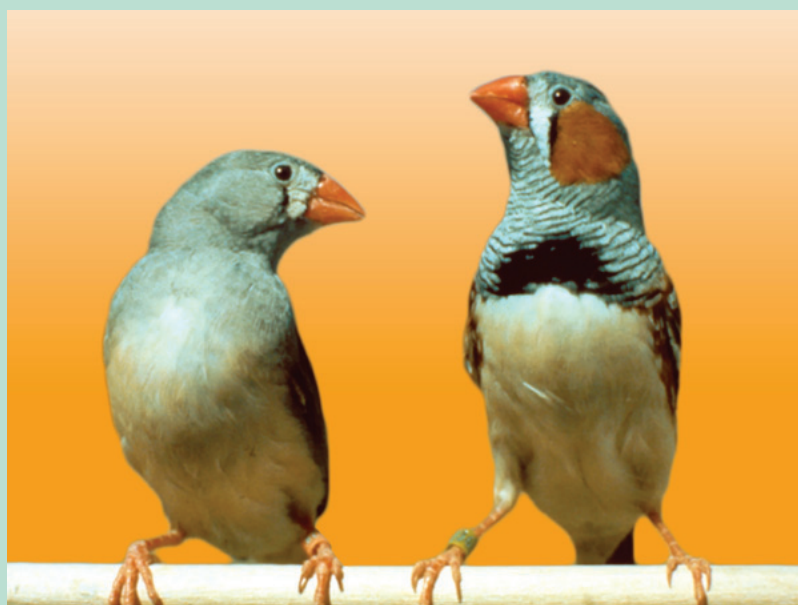

## Undergraduate Research as Instruction

# Table of Contents

## FEATURES

### *Letter to the Editor*

#### **Implications for Undergraduate Education of Two Interdisciplinary Biological Sciences: Biochemistry and Biophysics**

Jonghoon Kang and Crystal B. Purnell . . . . . 111–112

### *Approaches to Biology Teaching and Learning*

#### **Moving Theory into Practice: A Reflection on Teaching a Large, Introductory Biology Course for Majors**

Kimberly D. Tanner . . . . . 113–122

### *From the National Science Foundation*

#### **Undergraduate Research Experiences in Biology: Alternatives to the Apprenticeship Model**

Cynthia A. Wei and Terry Woodin . . . . . 123–131

### *Current Insights*

#### **Recent Research in Science Teaching and Learning**

Deborah Allen . . . . . 132–134

### *WWW.Life Sciences Education*

#### **Where Do New Medicines Come From?**

Dennis Liu . . . . . 135–141

### *Book Review*

#### **Discipline-Based Education Research: Preaching to Converts Who Are Learning to Sing in the Choir**

Mary Lee Ledbetter and Erin L. Dolan . . . . . 142–143

### *Book Review*

#### **Medical Mysteries for Instruction**

Lydia Morris . . . . . 144–145

### *Book Review*

#### **Tools and Tips for Teachers**

Gary Reiness . . . . . 146–148

### *Meeting Report*

#### **Harnessing Technology to Improve Formative Assessment of Student Conceptions in STEM: Forging a National Network**

Kevin C. Haudek, Jennifer J. Kaplan, Jennifer Knight, Tammy Long, John Merrill, Alan Munn, Ross Nehm, Michelle Smith, and Mark Urban-Lurain . . . . . 149–155

## ESSAY

#### **How Well Do Undergraduate Research Programs Promote Engagement and Success of Students?**

Marcus Fechheimer, Karen Webber, and Pamela B. Kleiber . . . . . 156–163

## ARTICLES

#### **Redesigning a Large-Enrollment Introductory Biology Course**

Catherine Ueckert, Alison Adams, and Judith Lock . . . . . 164–174

#### **Increased Course Structure Improves Performance in Introductory Biology**

Scott Freeman, David Haak, and Mary Pat Wenderoth . . . . . 175–186

#### **Teaching Students How to Study: A Workshop on Information Processing and Self-Testing Helps Students Learn**

Kathrin F. Stanger-Hall, Floyd W. Shockley, and Rachel E. Wilson . . . . . 187–198

#### **Undergraduate Science Research: A Comparison of Influences and Experiences between Premed and Non-Premed Students**

Lara Brongo Pacifici and Norman Thomson . . . . . 199–208

#### **Want to Improve Undergraduate Thesis Writing? Engage Students and Their Faculty Readers in Scientific Peer Review**

Julie A. Reynolds and Robert J. Thompson, Jr. . . . . 209–215

**Can Genetics and Genomics Nursing Competencies Be Successfully Taught in a Prenursing Microbiology Course?**  
Michèle Shuster ..... 216–221

**Using Digital Images of the Zebra Finch Song System as a Tool to Teach Organizational Effects of Steroid Hormones:  
A Free Downloadable Module**  
William Grisham, Natalie A. Schottler, Lisa M. Beck McCauley, Anh P. Pham, Maureen L. Ruiz, Michelle C. Fong, and  
Xinran Cui ..... 222–230

*On the Cover*

(1) Schematic/Diagram (top): This schematic depicts the song control system found in zebra finches and other songbirds. Circles represent collections of cell bodies, and arrows represent axonal connections among them. Some of these regions, Area X, HVC, and RA, are dramatically larger in males and are sensitive to the trophic effects of gonadal steroids in early development. Area X and HVC are proper names; IMAN is the lateral magnocellular nucleus of anterior nidopallium; DLM is the nucleus dorsolateralis anterior thalami, pars medialis; RA is the robust nucleus of arcopallium; and nXII is the hypoglossal nucleus. (2) Zebra Finches (bottom): This image shows the sexually dimorphic plumage of zebra finches. The male, on the right, sports orange cheek patches, fawn-colored brown feathers down his sides, and black and white stripes on his breast and throat, which give this species its name. The female, on the left, tends toward monochrome gray plumage. Sexual dimorphism in plumage is paralleled by sex differences in song behavior and in the brain circuit underlying this behavior, which is more elaborated in males. Image courtesy of Arthur P. Arnold, PhD, Department of Integrative Biology and Physiology, University of California, Los Angeles. See the article by William Grisham *et al.* on p. 222 on "Using Digital Images of the Zebra Finch Song System as a Tool to Teach Organizational Effects of Steroid Hormones: A Free Downloadable Module."
